# Supplementary material
Source: Springer Nature journal article supplement (https://www.springermedizin.de/resource/supplementary/12990_2010_320_MOESM8_ESM.pdf/9613026)

A

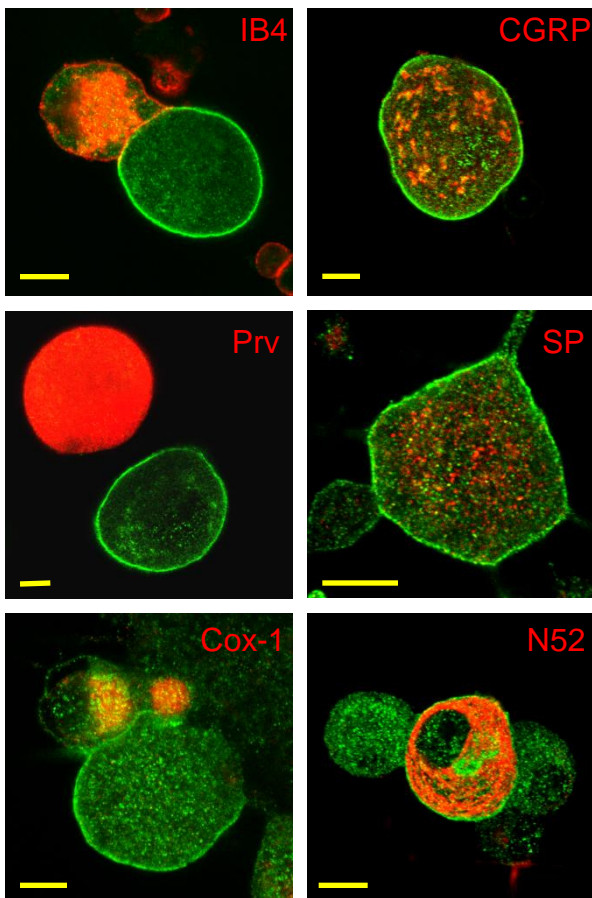

B

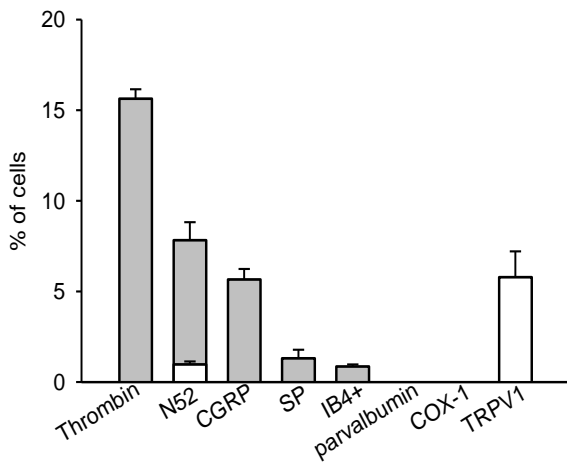

Supplement: MOESM8 [file 9613026]
